# Supplementary material
Source: HighWire-hosted journal article supplement (https://gut.bmj.com/content/71/9/1697)

## SUPPLEMENT

### Search Strategy

MEDLINE, EMBASE and EMBASE Classic, and the Cochrane central register of controlled trials were searched. The search was limited to humans. No restrictions were applied with regard to language of publication. A recursive search of the bibliography of relevant articles was also conducted. Conference proceedings from Digestive Diseases Week, Asia Pacific Digestive Week, and United European Gastroenterology Week were searched. The literature search used is given below.

For randomised controlled trials of eradication therapy for *H. pylori*-positive functional dyspepsia:

- 1 exp Dyspepsia/
- 2 dyspep\* or "NUD" or "FD"
- 3 indigestion or indigestive
- 4 1 or 2 or 3
- 5 exp helicobacter
- 6 exp helicobacter infections
- 7 exp helicobacter pylori
- 8 helicobacter or pylori or pyloridis or "HP" or Campylobacter
- 9 5 or 6 or 7 or 8

- 10 4 and 9
- 11 randomized controlled trial
- 12 controlled clinical trial.pt
- 13 random\*
- 14 placebo
- 15 drug therapy
- 16 trial
- 17 groups
- 18 11 or 12 or 13 or 14 or 15 or 16 or 17
- 19 exp animals/ not
- 20 18 not 19
- 21 10 and 20

For randomised controlled trials of drugs for functional dyspepsia:

- 1 dyspepsia.mp. or Dyspepsia/
- 2 dyspep\$.mp.
- 3 1 or 2
- 4 Antidepressive Agents, Second-Generation/ or Antidepressive Agents/ or venlafaxine.mp. or Serotonin Uptake Inhibitors/

- 5 psychotropic drugs.mp. or Psychotropic Drugs/
- 6 antidepressive agents.mp. or Antidepressive Agents/
- 7 Antidepressive Agents, Tricyclic/ or Desipramine/ or tricyclic.mp. or Nortriptyline/ or Serotonin Uptake Inhibitors/ or Imipramine/
- 8 desimipramine.mp.
- 9 doxepin.mp. or Doxepin/
- 10 dothiepin.mp. or Dothiepin/
- 11 Amitriptyline/ or amitryptiline.mp.
- 12 paroxetine.mp. or Paroxetine/
- 13 sertraline.mp. or Sertraline/
- 14 fluoxetine.mp. or Fluoxetine/
- 15 citalopram.mp. or Citalopram/
- 16 trimipramine.mp. or Trimipramine/
- 17 desipramine.mp. or Desipramine/
- 18 imipramine.mp. or Imipramine/
- 19 nortriptyline.mp. or Nortriptyline/
- 20 venlafaxine.mp.
- 21 duloxetine.mp.
- 22 escitalopram.mp.

- 23 Sulpiride/ or levosulpiride.mp.
- 24 mirtazapine.mp.
- 25 pregabalin
- 26 gabapentin
- 27 Histamine 2 receptor antagonists.mp.
- 28 Histamine-2 receptor antagonists.mp.
- 29 H2 receptor antagonists.mp.
- 30 H-2 receptor antagonists.mp.
- 31 famotidine.mp.
- 32 nizatidine.mp.
- 33 ranitidine.mp.
- 34 cimetidine.mp.
- 35 proton pump inhibitors.mp.
- 36 PPIs.mp. 35 omeprazole.mp.
- 37 esomeprazole.mp.
- 38 lansoprazole.mp.
- 39 dexlansoprazole.mp.
- 40 rabeprazole.mp.
- 41 pantoprazole.mp.

42 zantac.mp.

43 tagamet.mp.

44 losec.mp.

45 prilosec.mp.

46 zoton.mp.

47 nexium.mp.

48 pariet.mp.

49 protium.mp.

50 mosapride.mp.

51 itopride.mp.

52 Ganaton.mp.

53 acotiamide.mp.

54 Acofide.mp.

55 tegaserod.mp.

56 zelnorm.mp.

57 serotonin norepinephrine reuptake inhibitors.mp or Serotonin and Noradrenaline

Reuptake Inhibitors/

58 Serotonin 5-HT1 Receptor agonists/ or tandospirone.mp or Receptor, Serotonin, 5-

HT1A/

59. buspirone.mp or Buspirone/

60 4 or 5 or 6 or 7 or 8 or 9 or 10 or 11 or 12 or 13 or 14 or 15 or 16 or 17 or 18 or 19 or 20  
or 21 or 22 or 23 or 24 or 25 or 26 or 27 or 28 or 29 or 30 or 31 or 32 or 33 or 34 or 35 or 36  
or 37 or 38 or 39 or 40 or 41 or 42 or 43 or 44 or 45 or 46 or 47 or 48 or 49 or 50 or 51 or 52  
or 53 or 54 or 55 or 56 or 57 or 58 or 59

61 3 and 60

**Supplementary Table 1. Summary of Evidence from Randomised Controlled Trials of Drugs in Functional Dyspepsia.**

| <b>Intervention</b>                                            | <b>Number of RCTs</b> | <b>Number of Patients</b> | <b>FD Subtype</b> | <b>Relative Risk of Symptoms not Improving (95% CI)</b> | <b>Recommendation</b> | <b>Quality of Evidence</b> |
|----------------------------------------------------------------|-----------------------|---------------------------|-------------------|---------------------------------------------------------|-----------------------|----------------------------|
| <b><i>H. pylori</i> eradication therapy is effective in FD</b> | 29                    | 6781                      | Not stated        | 0.87 (0.83 to 0.92)                                     | Strong                | High                       |
| <b>Histamine-2-receptor antagonists may be effective in FD</b> | 12                    | 2268                      | Not stated        | 0.79 (0.68 to 0.92)                                     | Weak                  | Low                        |
| <b>Proton pump inhibitors are effective in FD</b>              |                       |                           |                   |                                                         |                       |                            |
| Any dose                                                       | 16                    | 6017                      | Not stated        | 0.88 (0.83 to 0.93)                                     | Strong                | High                       |
| High dose                                                      | 5                     | 1627                      | Not stated        | 0.86 (0.74 to 1.01)                                     | Strong                | High                       |
| Standard dose                                                  | 9                     | 2890                      | Not stated        | 0.86 (0.78 to 0.95)                                     | Strong                | High                       |
| Low dose                                                       | 9                     | 2755                      | Not stated        | 0.89 (0.81 to 0.97)                                     | Strong                | High                       |

|                                                                                 |   |      |            |                     |        |          |
|---------------------------------------------------------------------------------|---|------|------------|---------------------|--------|----------|
| <b>Prokinetics may be effective in FD</b>                                       |   |      |            |                     |        |          |
| Acotiamide                                                                      | 6 | 2429 | Mainly PDS | 0.89 (0.78 to 1.00) | Weak   | Low      |
| Itopride                                                                        | 5 | 1854 | Not stated | 0.88 (0.77 to 1.01) | Weak   | Low      |
| Mosapride                                                                       | 1 | 589  | Not stated | 0.99 (0.80 to 1.23) | Weak   | Low      |
| Tegaserod                                                                       | 2 | 2667 | Not stated | 0.89 (0.82 to 0.96) | Strong | Moderate |
| <b>Antipsychotic drugs (sulpiride and levosulpiride) may be effective in FD</b> | 3 | 172  | Not stated | 0.50 (0.37 to 0.67) | Weak   | Low      |
| <b>Tricyclic antidepressants are effective in FD</b>                            | 4 | 400  | Not stated | 0.75 (0.62 to 0.90) | Strong | Moderate |
| <b>Selective serotonin reuptake inhibitors are not effective in FD</b>          | 2 | 388  | Not stated | 1.01 (0.89 to 1.15) | Weak   | Moderate |
| <b>Serotonin norepinephrine reuptake inhibitors are not effective in FD</b>     | 1 | 160  | Not stated | 1.02 (0.80 to 1.30) | Weak   | Low      |
| <b>Tandospirone may be effective in FD</b>                                      | 1 | 150  | Not stated | 0.79 (0.66 to 0.94) | Weak   | Low      |
| <b>Buspiron is not effective in FD</b>                                          | 1 | 16   | Not stated | 0.48 (0.20 to 1.15) | Weak   | Low      |



|                                          |   |    |            |                     |      |     |
|------------------------------------------|---|----|------------|---------------------|------|-----|
| <b>Pregabalin may be effective in FD</b> | 1 | 72 | Not stated | 0.53 (0.29 to 0.96) | Weak | Low |
|------------------------------------------|---|----|------------|---------------------|------|-----|

**Supplementary Table 2. Total Number of Trials of Each Treatment, and Total Number of Included Patients Assigned to Each Drug and Placebo in the Network Meta-analysis of Drugs Used First or Second Line in FD.**

| <b>Treatment</b>                             | <b>Number of RCTs</b> | <b>Total Number of Patients</b> |
|----------------------------------------------|-----------------------|---------------------------------|
| H <sub>2</sub> -receptor antagonists         | 16                    | 1293                            |
| Itopride                                     | 13                    | 1653                            |
| Standard dose proton pump inhibitors         | 11                    | 1693                            |
| Low dose proton pump inhibitors              | 10                    | 1431                            |
| Mosapride                                    | 8                     | 908                             |
| High dose proton pump inhibitors             | 7                     | 1288                            |
| Domperidone                                  | 7                     | 587                             |
| Acotiamide                                   | 6                     | 1540                            |
| Tricyclic antidepressants                    | 5                     | 228                             |
| 5-HT <sub>1A</sub> agonists                  | 5                     | 158                             |
| Selective serotonin reuptake inhibitors      | 3                     | 216                             |
| Antipsychotics                               | 3                     | 86                              |
| Tegaserod                                    | 2                     | 1337                            |
| Mirtazapine                                  | 2                     | 37                              |
| Serotonin norepinephrine reuptake inhibitors | 1                     | 80                              |
| Pregabalin                                   | 1                     | 38                              |

|         |    |      |
|---------|----|------|
| Placebo | 55 | 6742 |
|---------|----|------|

**Supplementary Figure 1. Forest Plot of Randomised Controlled Trials of Eradication Therapy in *H. pylori*-positive FD in Terms of Effect on Cure or Improvement of Symptoms: Pairwise Meta-analysis.**

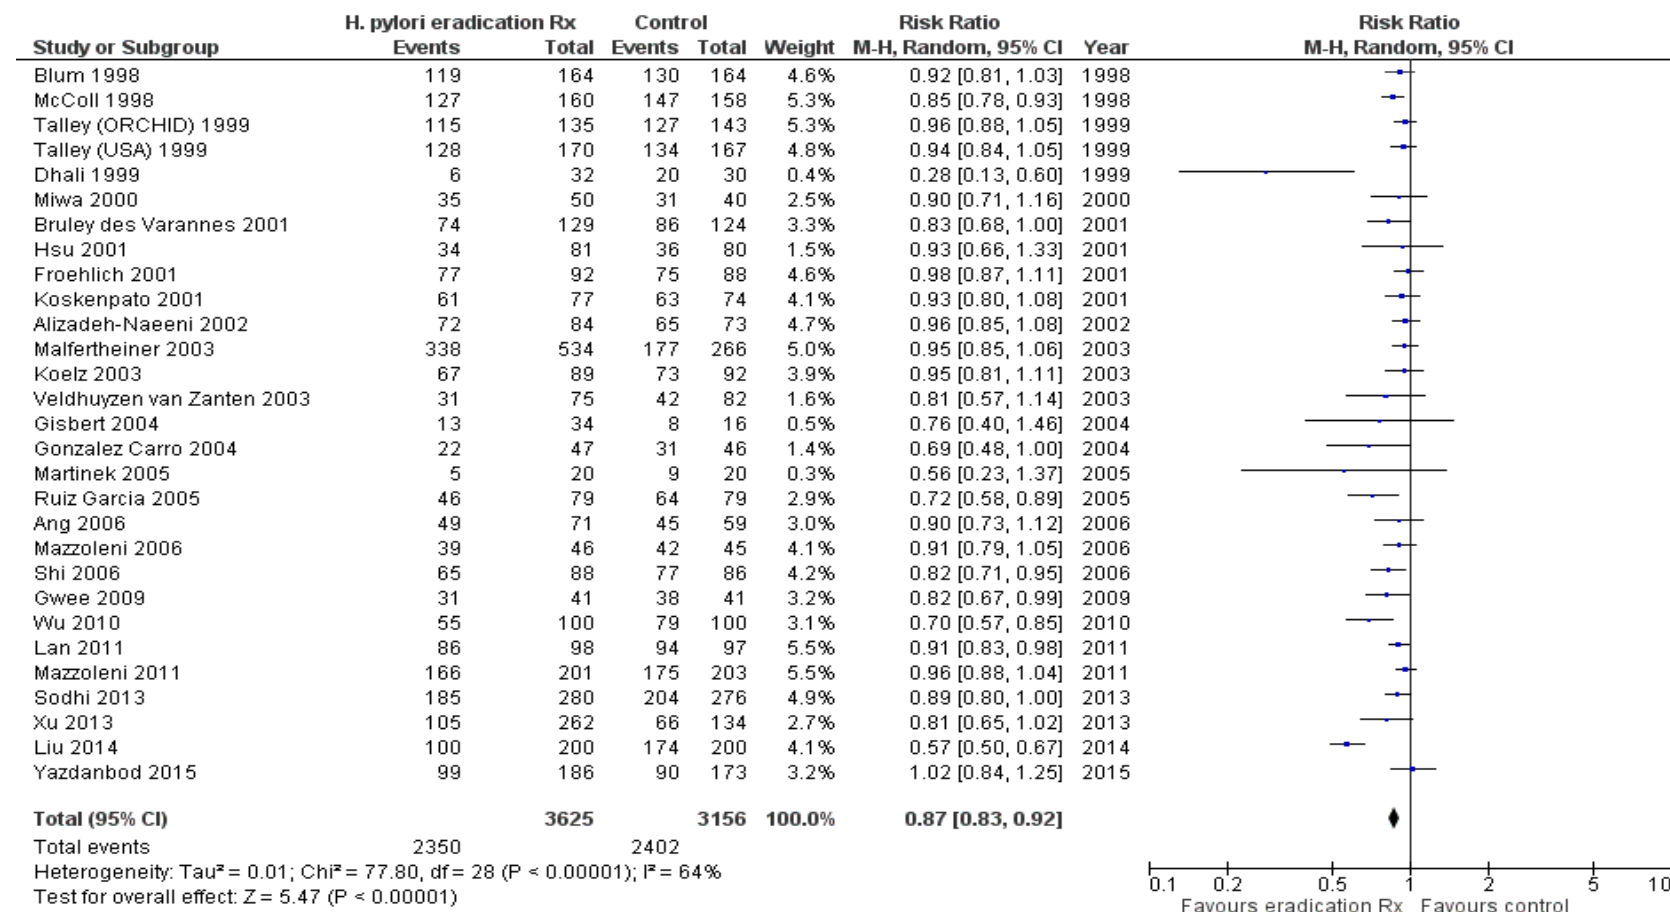

**Supplementary Figure 2. Forest Plot of Randomised Controlled Trials of Eradication Therapy in *H. pylori*-positive FD in Terms of Effect on Cure or Improvement of Symptoms in Patients with Successful Eradication of *H. pylori*: Pairwise Meta-analysis.**

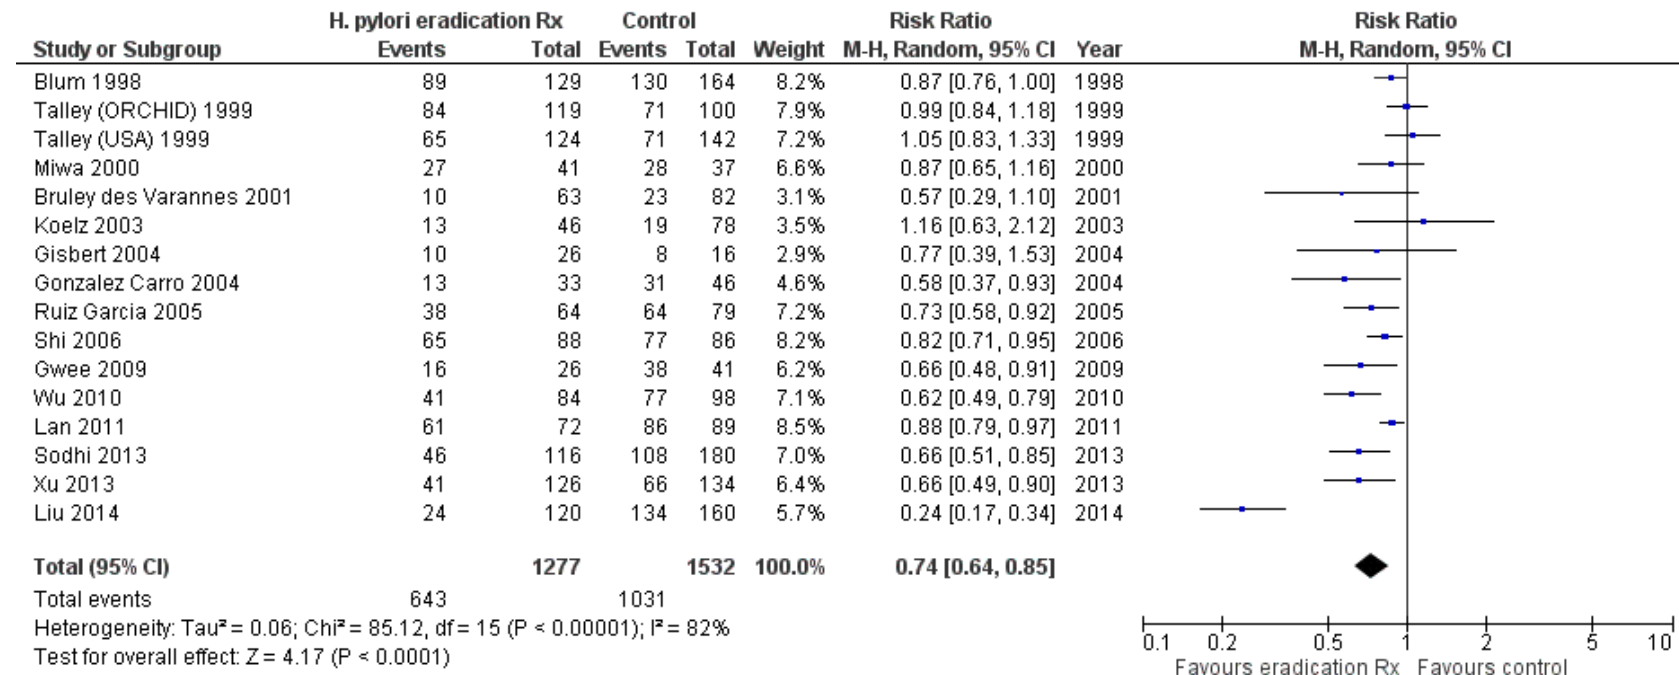

**Supplementary Figure 3. Forest Plot of Randomised Controlled Trials of Eradication Therapy in *H. pylori*-positive FD in Terms of Effect on Cure of Symptoms: Pairwise Meta-analysis.**

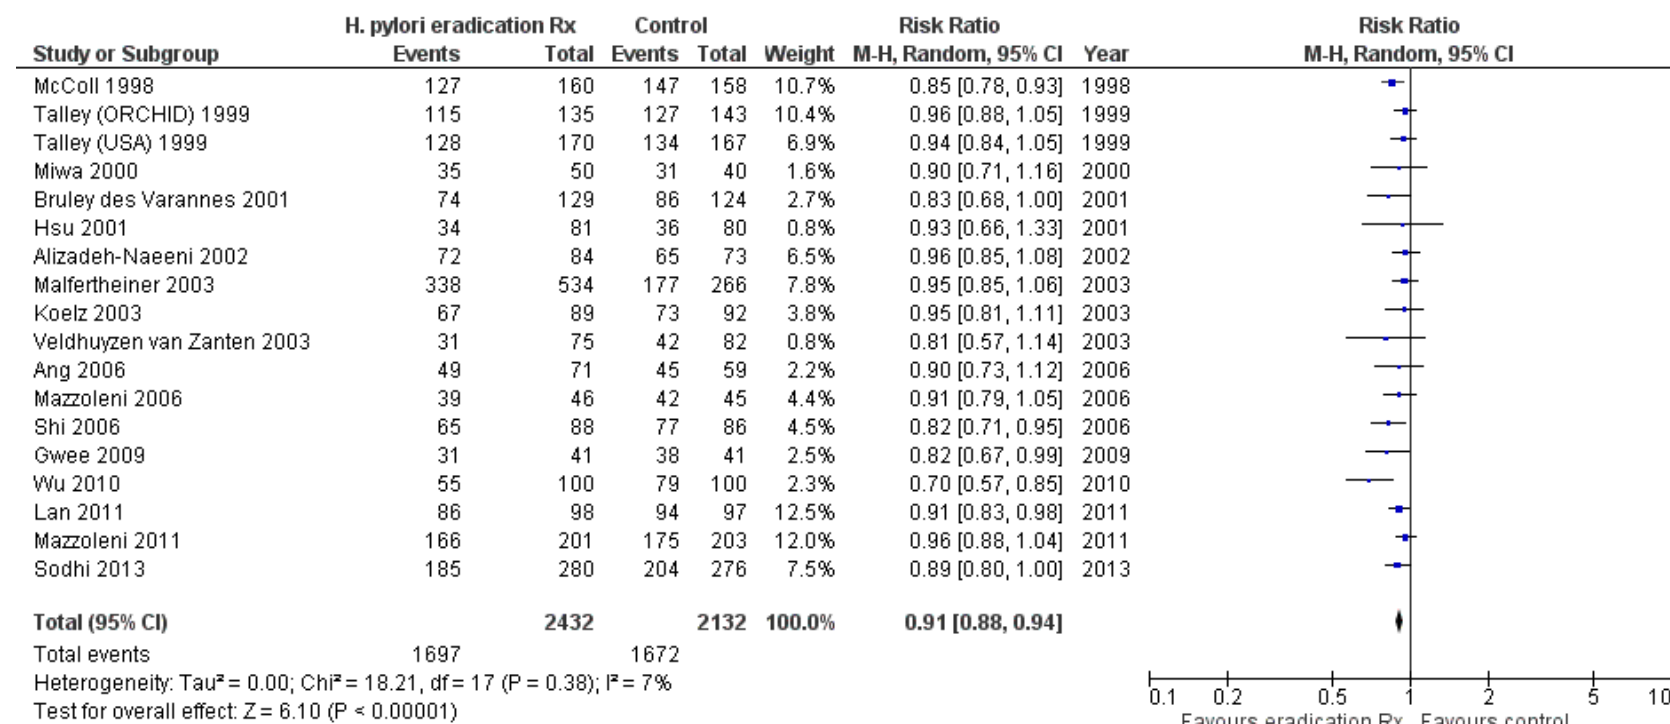

**Supplementary Figure 4. Forest Plot of Randomised Controlled Trials of Histamine-2-Receptor Antagonists in FD in Terms of Effect on Improvement of Symptoms: Pairwise Meta-analysis.**

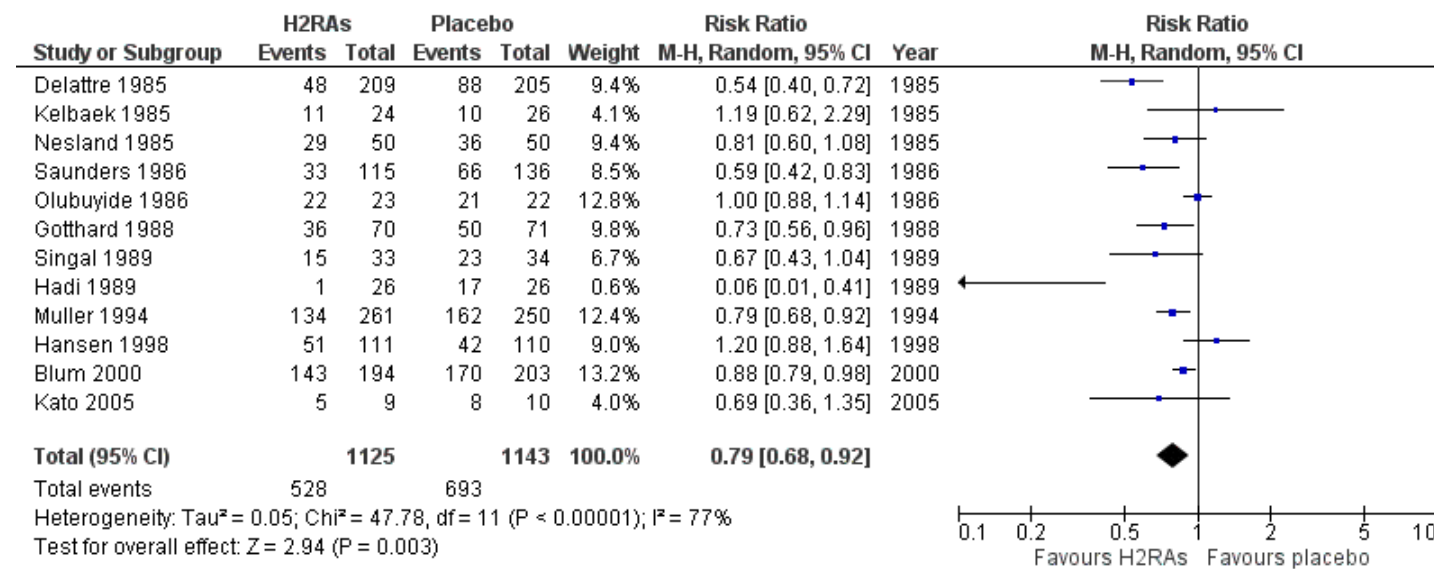

**Supplementary Figure 5. Forest Plot of Randomised Controlled Trials of Histamine-2-Receptor Antagonists in FD in Terms of Effect on Cure of Symptoms: Pairwise Meta-analysis.**

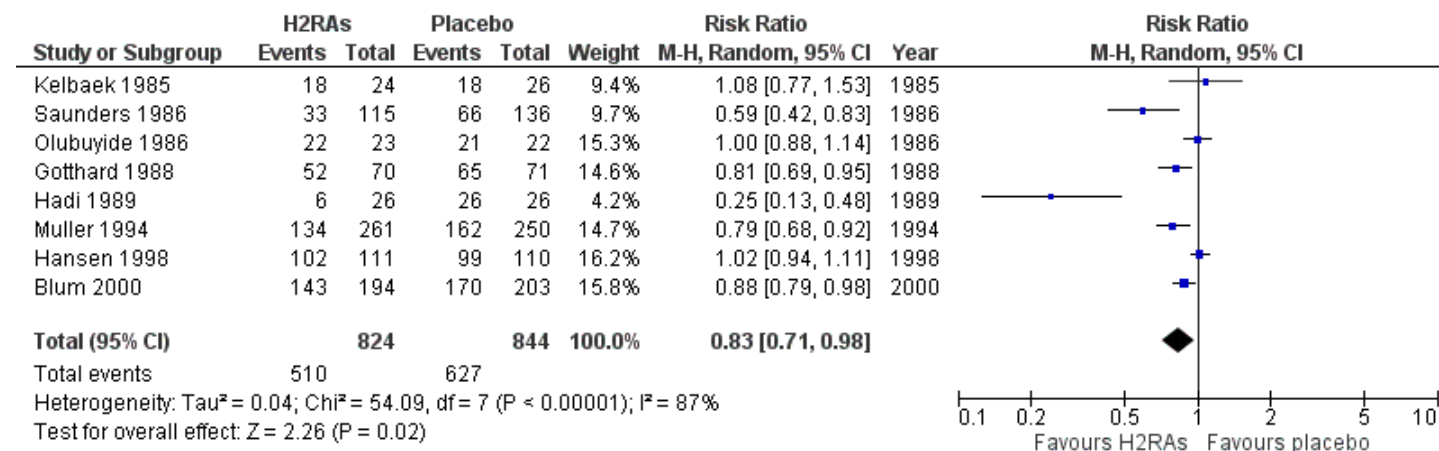



## Supplementary Figure 6. Forest Plot of Randomised Controlled Trials of Proton Pump Inhibitors in FD in Terms of Effect on Improvement of Symptoms: Pairwise Meta-analysis.

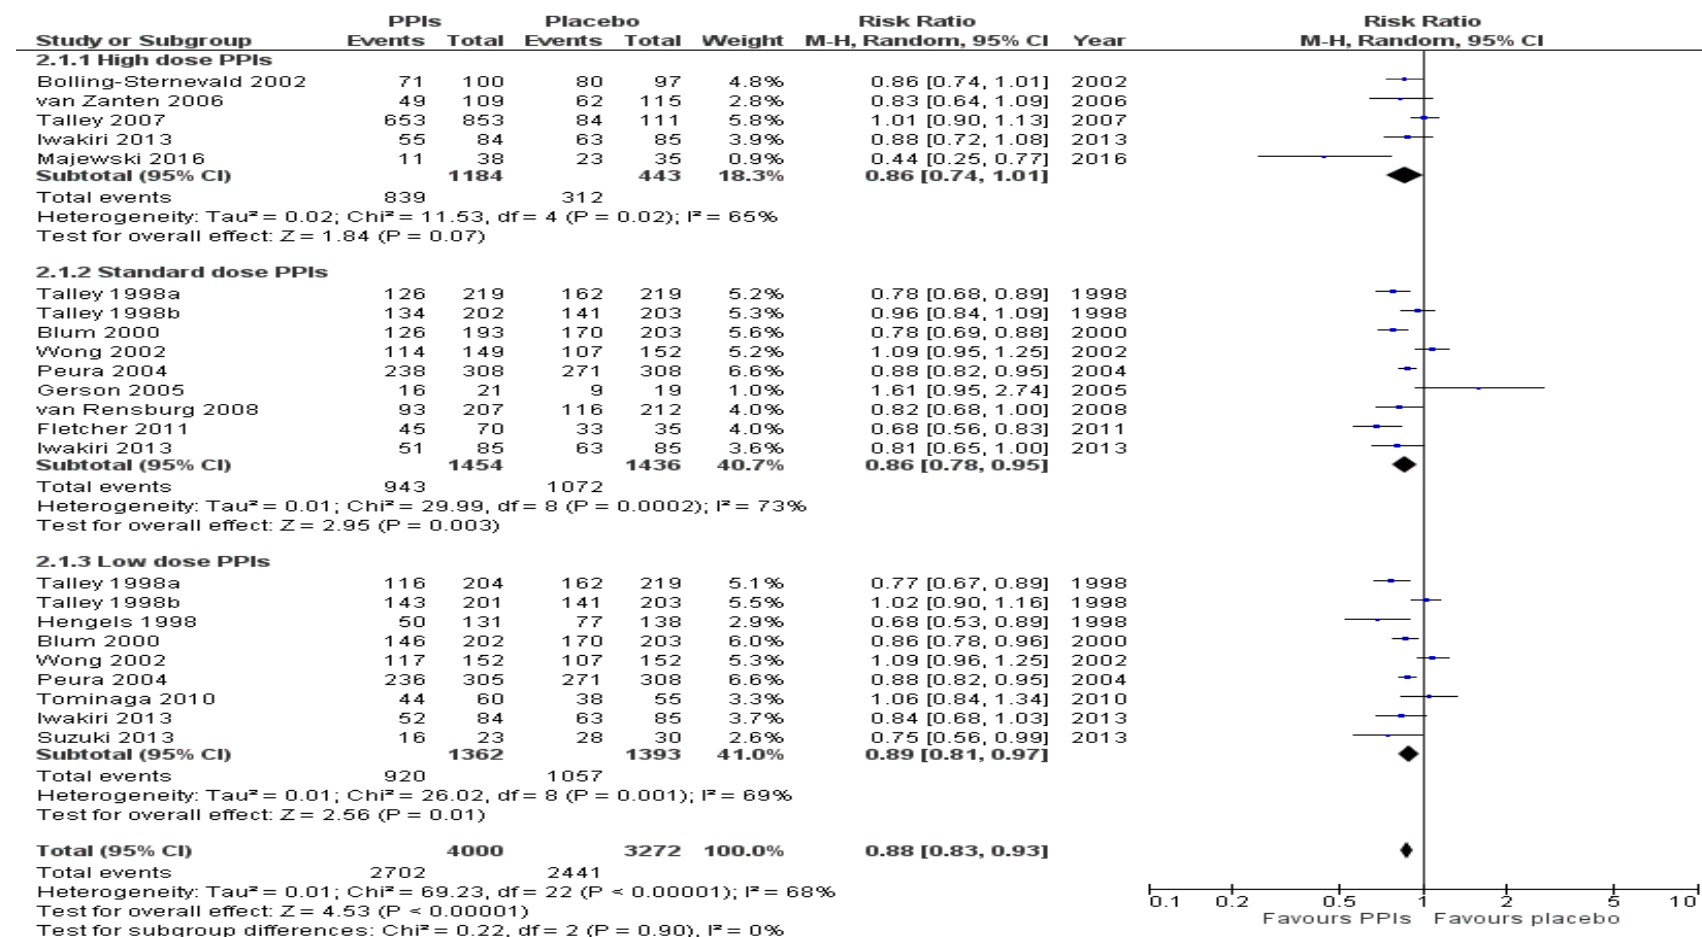

### Supplementary Figure 7. Forest Plot of Randomised Controlled Trials of Proton Pump Inhibitors in FD in Terms of Effect on Cure of Symptoms: Pairwise Meta-analysis.

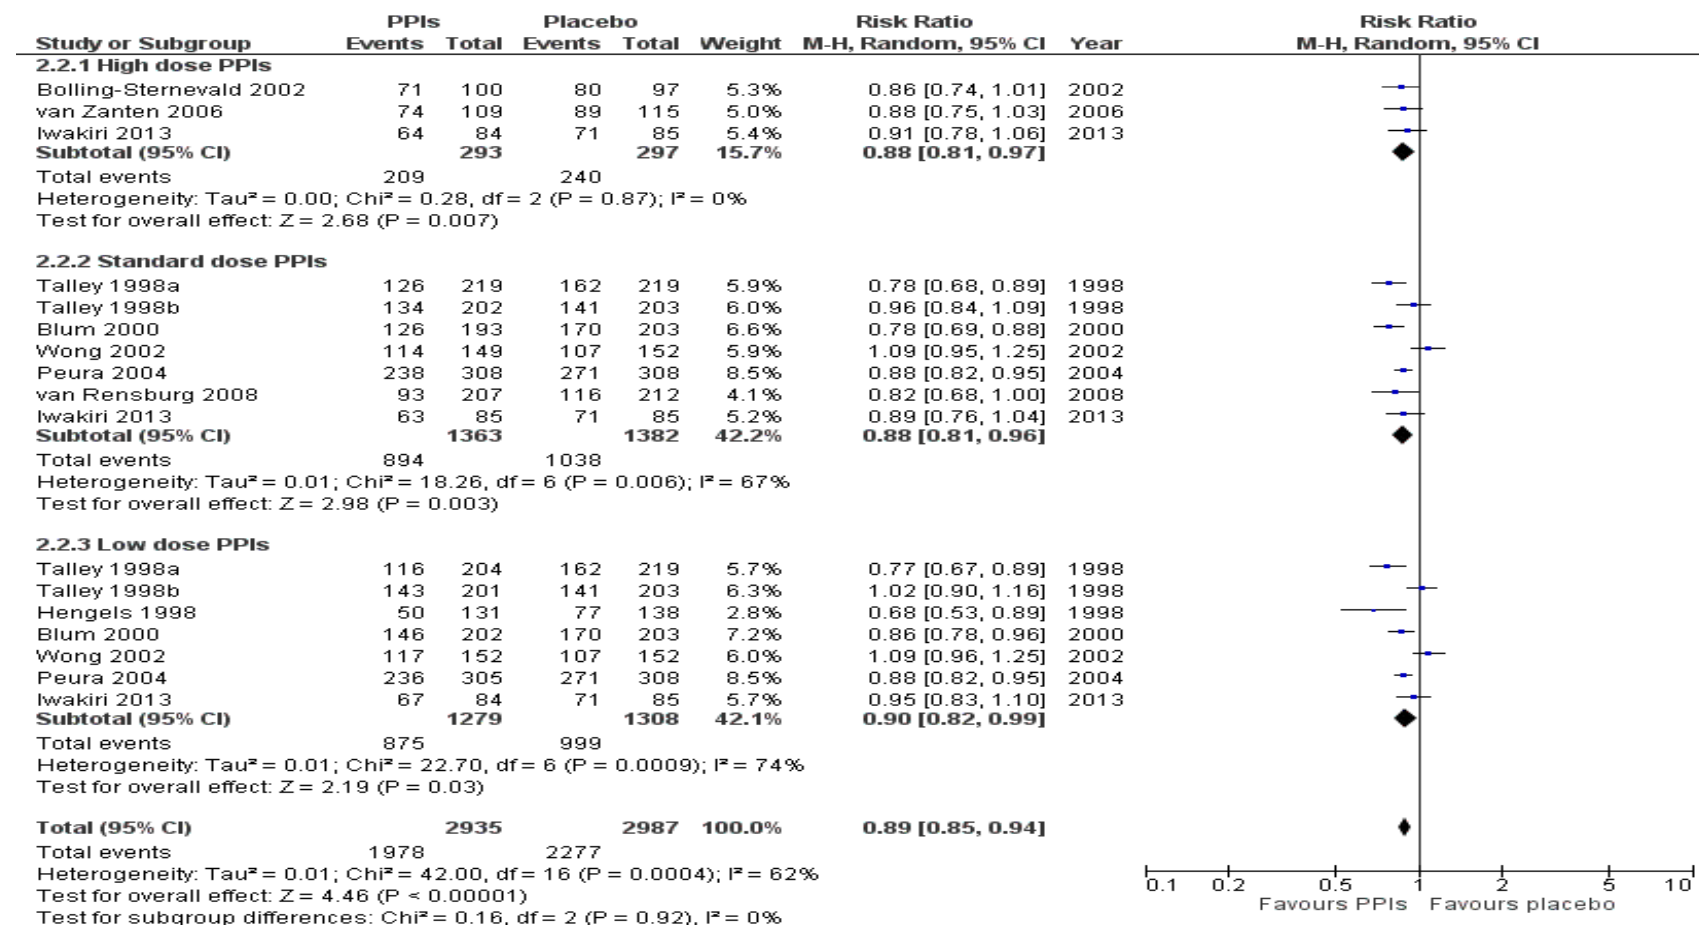

### Supplementary Figure 8. Forest Plot of Randomised Controlled Trials of Prokinetics in FD in Terms of Effect on Improvement of Symptoms: Pairwise Meta-analysis.

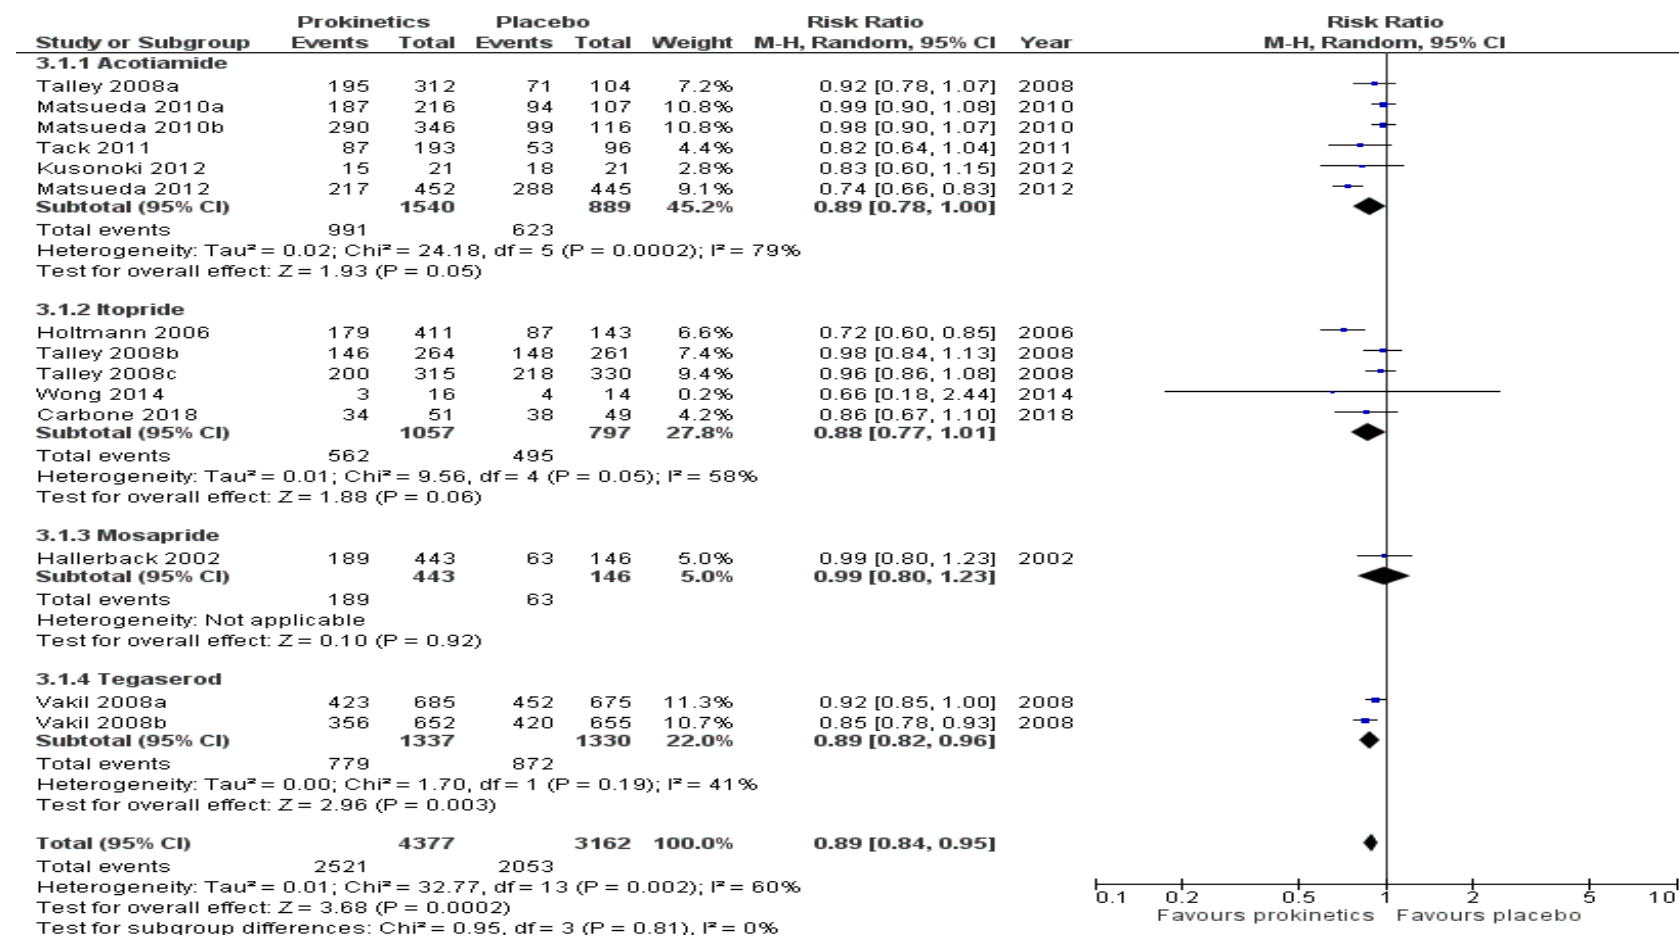

## Supplementary Figure 9. Forest Plot of Randomised Controlled Trials of Gut-brain Neuromodulators in FD in Terms of Effect on Improvement of Symptoms: Pairwise Meta-analysis.

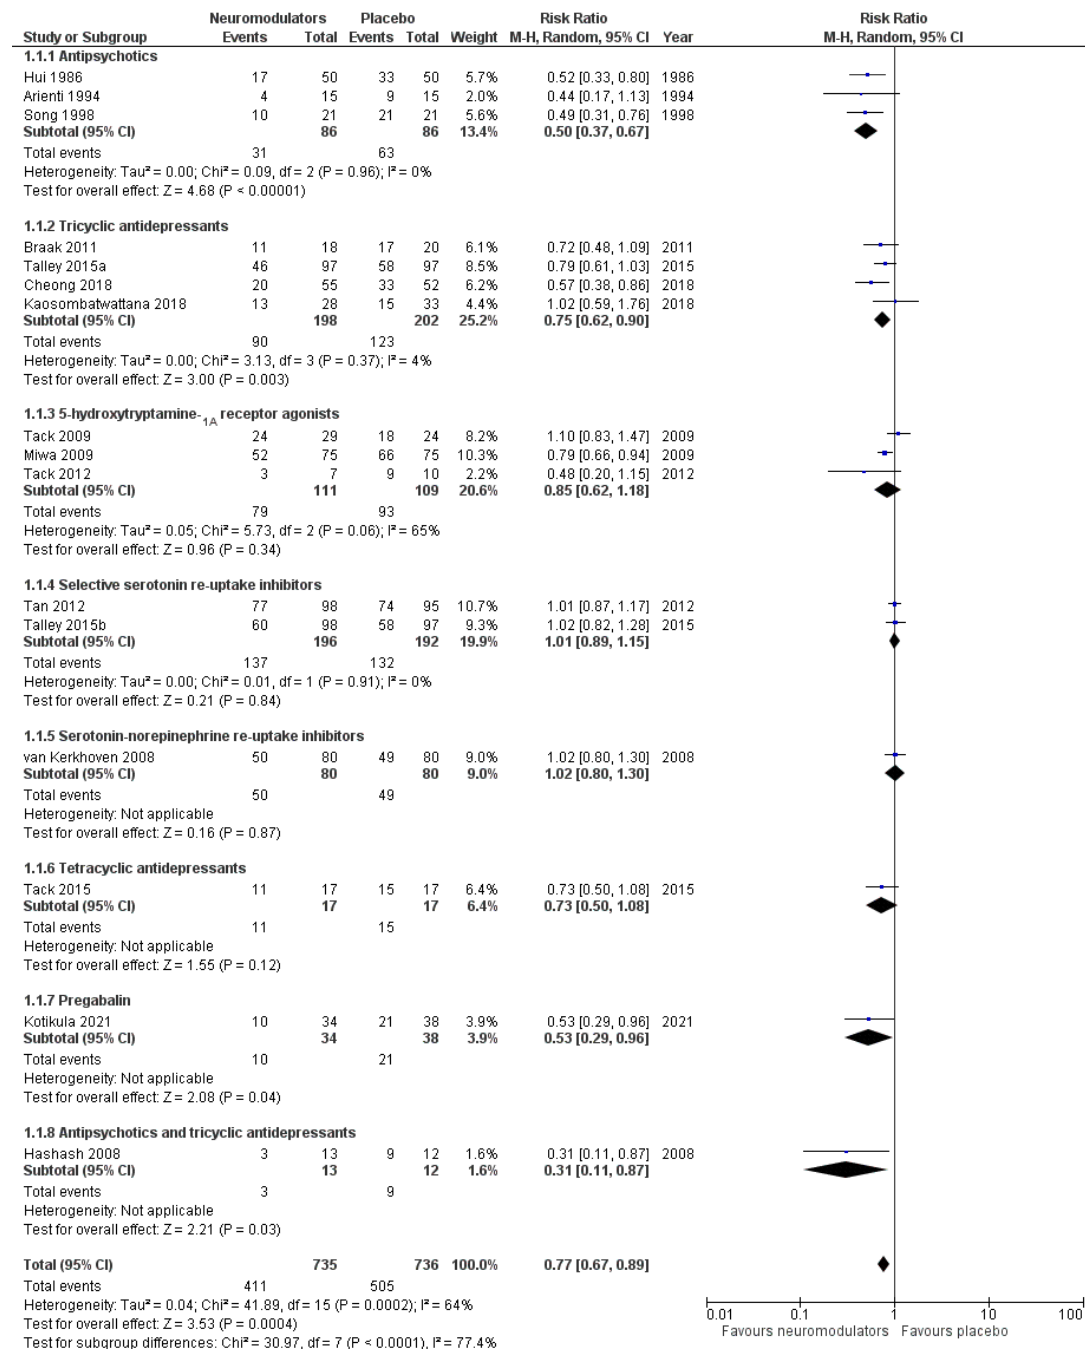

**Supplementary Figure 10. Forest Plot of Randomised Controlled Trials of Drugs Used First or Second Line in Terms of Effect on Improvement of Symptoms: Network Meta-analysis.**

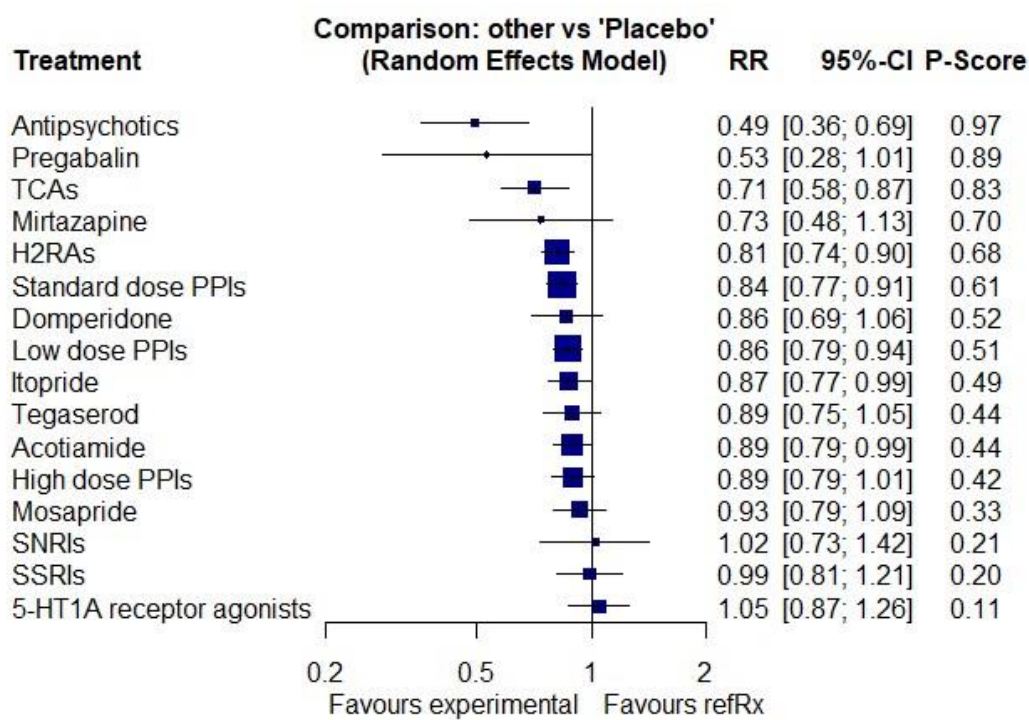

Supplement: inline-supplementary-material-1 [file inline-supplementary-material-1.pdf]
